# Supplementary material for: In situcross-linkable hyaluronic acid hydrogels using copper free click chemistry for cartilage tissue engineering
Source: Royal Society of Chemistry journal article supplement (doi:10.1039/c7py01654a), 2017-10-25

## Supporting Information

### ***In situ* cross-linkable hyaluronic acid hydrogels using copper free click chemistry for cartilage tissue engineering**

Sang-Soo Han<sup>a#</sup>, Hong Yeol Yoon<sup>b#</sup>, Ji Young Yhee<sup>b</sup>, Myung-Ok Cho<sup>a,c</sup>, Hye-Eun Shim<sup>a</sup>, Ji-Eun Jeong<sup>a,g</sup>, Dong-Eun Lee<sup>d</sup>, Kwangmeyung Kim<sup>b</sup>, Hwanuk Guim<sup>e</sup>, John Hwan Lee<sup>f</sup>, Kang Moo Huh<sup>c\*</sup> and Sun-Woong Kang<sup>a,g\*</sup>

<sup>a</sup>. Predictive Model Research Center, Korea Institute of Toxicology, Daejeon, Korea

<sup>b</sup>. Center for Theragnosis, Biomedical Research Institute, Korea Institute of Science and Technology, Seoul, Korea

<sup>c</sup>. Department of Polymer Science and Engineering, Chungnam National University, Daejeon, Korea, E-mail: khuh@cnu.ac.kr; Phone: +82-42-821-6663; Fax: +82-42-821-8910

<sup>d</sup>. Advanced Radiation Technology Institute, Korea Atomic Energy Research Institute, Jeongeup, Korea

<sup>e</sup>. Center for Electron Microscopy Research, Korea Basic Science Institute, Daejeon, Korea

<sup>f</sup>. Department of Chemical Engineering, Hanyang University, Seoul, Republic of Korea

<sup>g</sup>. Department of Human and Environmental Toxicology Program, University of Science and Technology (UST), Daejeon, Korea, E-mail: swkang@kitox.re.kr; Phone: +82-42-610-8209; Fax: +82-42-610-8157

**Figure S1. Histological examination of HA-PEG4-DBCO hydrogel encapsulated chondrocytes ( $1 \times 10^7$  cells/ml). 4-arm PEG azide concentration; 0.25mM (A) Alcian blue staining of HA-PEG4-DBCO hydrogel. (B) Safranin-O staining of HA-PEG4-DBCO hydrogel. Scale bar; 100 $\mu$ m**

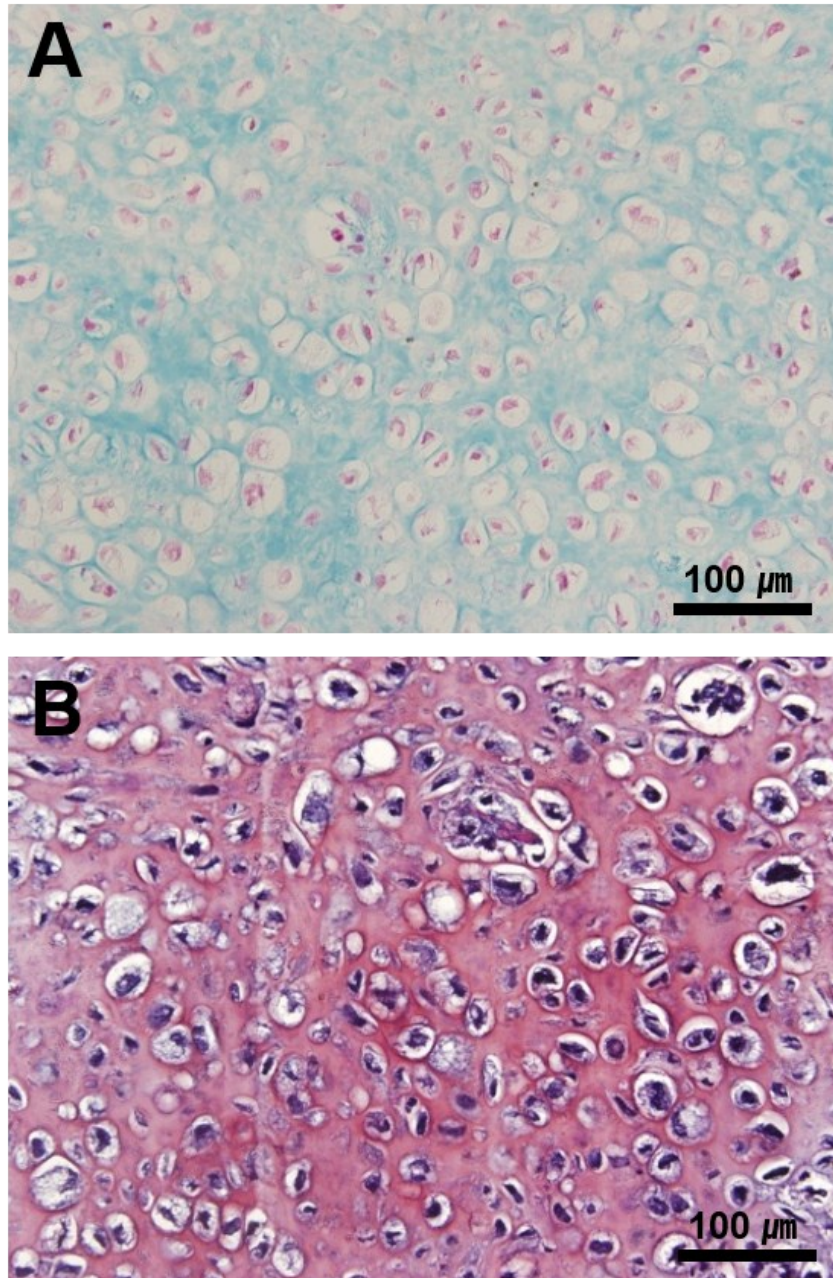

Supplement: c7py01654a1.pdf [file c7py01654a1.pdf]
